# Supplementary material
Source: PubMed Central journal article supplement (PMC6930842)
Supplement: 10-1055-s-0039-3402714-s190184ra.pdf [file 10-1055-s-0039-3402714-s190184ra.pdf]

## Original Design

### A: "Prepare" Order

### B: "Transfuse" Order

## User-Centered Design

### C: "Prepare" Order

### D: "Transfuse" Order

© 2019 Epic Systems Corporation. Used with permission.

**Supplementary Fig. S2** Comparison of the "prepare" and "transfuse" orders before intervention (original design) and after formative usability testing (UCD). UCD, user-centered design.

1) Which interface do you prefer overall?

Original                      No preference                      New

-----

(Place a mark on the scale above)

---

Please describe how much you agree with the following statements:

---

2) The new system is easy to use

Strongly Disagree

Disagree

Neutral

Agree

Strongly Agree

---

3) The new system allowed me to perform tasks efficiently

Strongly Disagree

Disagree

Neutral

Agree

Strongly Agree

---

4) The new system was useful

Strongly Disagree

Disagree

Neutral

Agree

Strongly Agree

---

5) Overall, I am satisfied with the new system

Strongly Disagree

Disagree

Neutral

Agree

Strongly Agree

**Supplementary Fig. S3** Survey instrument used in step 5 of the summative usability test to evaluate users' preference between the user-centered design (UCD; "new system" in the survey instrument) and the original design, as well as their impression of the UCD orders, and order sets' ease of use, usefulness, efficiency, and overall rating.
